# Supplementary material for: Immune Complexes Impaired Glomerular Endothelial Cell Functions in Lupus Nephritis
Source: MDPI journal article supplement (doi:10.3390/ijms20215281), 2019-10-24
Supplement: s1 [file s1]

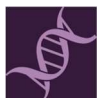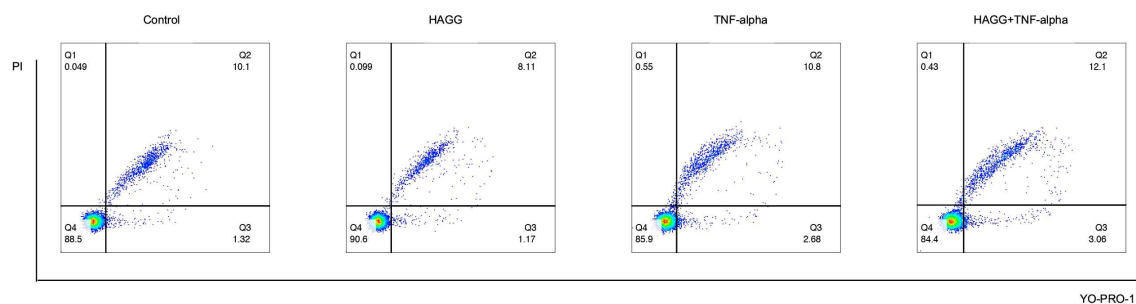

**Figure S1.** Representative flow cytometry plots for YO-PRO-1/PI assay. GECs were treated with complete medium (control), HAGG (400  $\mu\text{g/mL}$ ), TNF-alpha (10  $\text{ng/mL}$ ), or TNF-alpha plus HAGG, for 48 hours. Live cells are defined by the double negative population, while the dead cells are defined by the double positive population. Apoptotic cells are YO-PRO-1+PI-. These are representative plots from one of the six independent experiments.
